## Fgfr-Ras-MAPK signaling is required for apical constriction via apical positioning of Rho-associated kinase during mechanosensory organ formation

**Molly J. Harding and Alex V. Nechiporuk**

There was an error in the version of *Development* **139**, 3130-3135 published on ePress on July 25th, 2012.

Chitnis et al. (2012) was incorrectly cited in the context that Fgf signals have been shown to regulate the transcription of *shroom3*. The following sentence has therefore been removed: Alternatively, Fgf signals have been shown to regulate transcription of *shroom3* (Chitnis et al., 2012), which encodes a scaffolding molecule that can anchor Rock and promote apical Rock localization (Nishimura and Takeichi, 2008).

The full online issue and print versions are correct.

The authors apologise to readers for this mistake.
